# Supplementary material for: Delays in gender affirming healthcare due to COVID-19 are mitigated by expansion of telemedicine
Source: Elsevier journal article supplement (doi:10.1016/j.amjsurg.2022.09.036), 2022-09-23
Supplement: mmc3 [file mmc3.pdf]

## **Supplemental Figure 3**

### **Semi-Structured Interview Guide**

Thank you again for agreeing to be interviewed by me. As a reminder, I'm doing this study to learn more about the impact of the Covid-19 pandemic on the ability of transgender folks to access the healthcare resources they need to stay well.

As a reminder, you are welcome to pause the interview, ask for clarification, refuse to answer a question, and or stop the interview at any time. Additionally, you're always welcome to ask me any question you might have; I won't ask you a question I'm not prepared to answer myself.

Are you okay with me taking some hand-written notes during the interview?

*Yes/No*

### **Gender Identity**

What gender terms would you use to describe yourself?

*Transfeminine, transmasculine, genderqueer, non-binary, etc.*

Are you interested in gender-affirming medical therapy?

*Specifically, hormones, surgeries, psychotherapy, etc.*

BEFORE the Covid-19 pandemic / NC stay-at-home order....were you pursuing any form of gender-affirming medical therapy?

*Including hormones, surgeries, psychotherapy, etc.*

AFTER the Covid-19 pandemic / NC stay-at-home order....have you been able to pursue gender-affirming medical therapy?

*Including hormones, surgeries, psychotherapy, etc.*

### **Gender Health – Insurance Access**

BEFORE the Covid-19 pandemic / NC stay-at-home order....did you have difficulties with health insurance coverage, such as being unable to pay for medical care?

*Including hormones, surgeries, psychotherapy, etc.*

AFTER the Covid-19 pandemic / NC stay-at-home order....has your health insurance become EASIER or HARDER to work with?

*Can you tell me more about that?*

AFTER the Covid-19 pandemic / NC stay-at-home order....has your healthcare team offered MORE telemedicine options?

*Can you tell me more about that?*

AFTER the Covid-19 pandemic / NC stay-at-home order....are you concerned that your health insurance will change, and you will lose access to gender healthcare coverage?

*Can you tell me more about that?*

### **Urgent Care – Options and Concerns**

BEFORE the Covid-19 pandemic / NC stay-at-home order....did you know of a local clinic or hospital you could go to if you felt acutely sick?

*Have you been to that clinic/hospital in the past?*

*Did you feel welcome at that facility? Why or why not?*

AFTER the Covid-19 pandemic / NC stay-at-home order....do you know of a local clinic or hospital you could go to if you felt acutely sick?

*Have you been to that clinic/hospital in the past?*

*Do you feel welcome at that facility? Why or why not?*

AFTER the Covid-19 pandemic / NC stay-at-home order....have you felt acutely sick, but AVOIDED going to a clinic or hospital due to fears of discrimination?

*Can you tell me more about that?*

### **Hormone Provider & Mental Healthcare**

BEFORE the Covid-19 pandemic / NC stay-at-home order....did you have difficulties accessing your hormone provider or mental healthcare provider?

*Specific to hormones and psychotherapy.*

*Can you tell me more about that?*

AFTER the Covid-19 pandemic / NC stay-at-home order....has it become EASIER or HARDER to access your hormone provider or mental healthcare provider?

*Can you tell me more about that?*

AFTER the Covid-19 pandemic / NC stay-at-home order....has your hormone provider or mental healthcare provider offered MORE telemedicine options?

*Can you tell me more about that?*

### **Surgical Healthcare**

BEFORE the Covid-19 pandemic / NC stay-at-home order....did you have difficulties with health insurance coverage, such as being unable to arrange for a surgical consultation?

*Specifically surgical clinic consultations, to discuss or plan surgeries, or aftercare.*

*Can you tell me more about that?*

AFTER the Covid-19 pandemic / NC stay-at-home order....has it become EASIER or HARDER to access your surgical team?

*Can you tell me more about that?*

AFTER the Covid-19 pandemic / NC stay-at-home order....has your surgical team offered MORE telemedicine options?

*Can you tell me more about that?*

AFTER the Covid-19 pandemic / NC stay-at-home order....are you concerned that your surgical procedure(s) may not be able to happen in the timeframe you had hoped for?

*Can you tell me more about that?*

LAST question, I promise: I always like to ask my participants to pick a pseudonym (fake name) for me to use when I talk what was said in the interview. What name would you like me to use?
